# Supplementary material for: Interaction of organic ions with proteins
Source: Royal Society of Chemistry journal article supplement (doi:10.1039/c6sm02048h), 2016-12-09
Supplement: c6sm02048h1.pdf [file c6sm02048h1.pdf]

## Supporting Information for publication

### Interaction of organic ions with proteins

Leonor Pérez-Fuentes<sup>a</sup>, Carlos Drummond<sup>\* b</sup>, Jordi Faraudo<sup>c</sup> and Delfi Bastos-González<sup>\* a</sup>

<sup>a</sup>BioColloid and Fluid Physics Group, Department of Applied Physics. University of Granada, Av. Fuentenueva S/N, 18071 Granada (Spain)

<sup>b</sup>CNRS, Centre de Recherche Paul Pascal (CRPP), UPR 8641, F3300, Pessac, France  
Université de Bordeaux, CRPP, UPR 8641, F-33600 Pessac, France

<sup>c</sup>Institut de Ciència dels Materials de Barcelona (ICMAB-CSIC), Carrer dels Tillers s/n, Campus de la UAB, E-08193 Bellaterra, Barcelona (Spain)

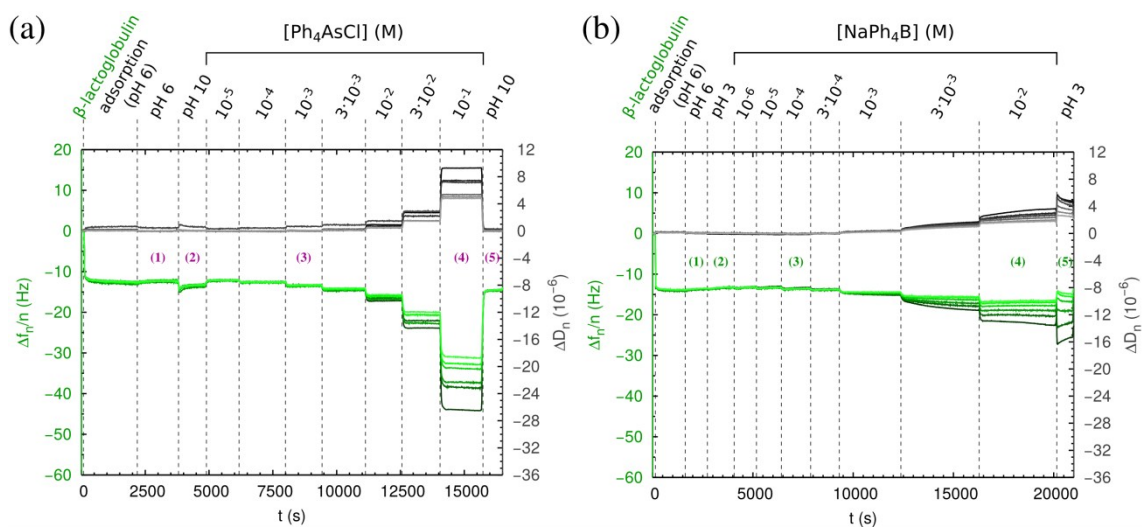

**Fig. 1:** QCM-D measurements of  $\beta$ -lactoglobulin film in presence of (a)  $\text{Ph}_4\text{As}^+\text{Cl}^-$  at pH 10 and (b)  $\text{Na}^+\text{Ph}_4\text{B}^-$  at pH 3 (organic ions as counter-ions). Changes in frequency,  $\Delta f_n/n$  (negative values) and changes in energy dissipation,  $\Delta D_n$  (positive values) are represented. Each overtone from 3 to 13 is shown in a different tonality, from dark to pale color.

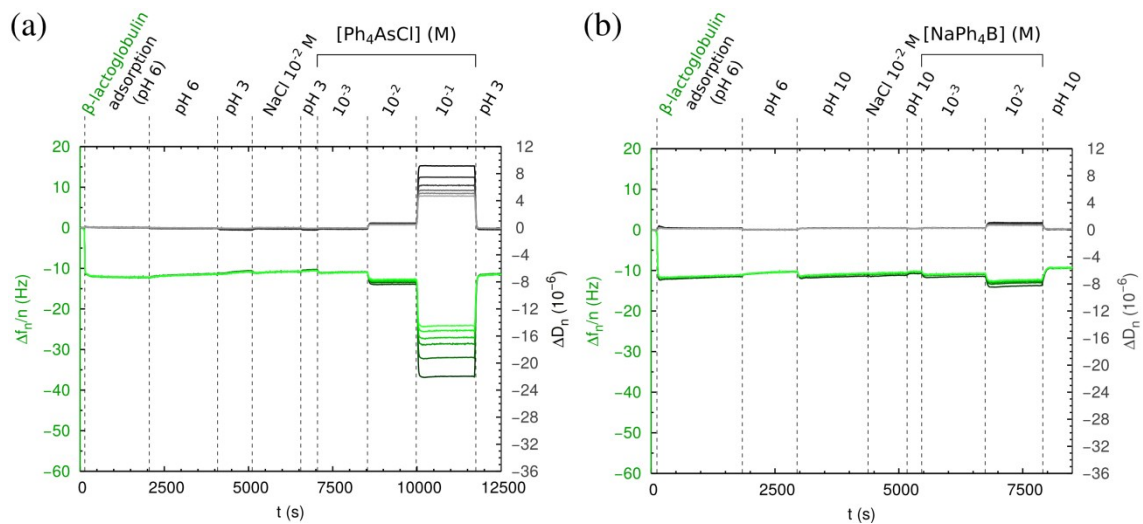

**Fig. 2:** QCM-D measurements of  $\beta$ -lactoglobulin film in the presence of (a)  $\text{Ph}_4\text{As}^+\text{Cl}^-$  at pH 3 and (b)  $\text{Na}^+\text{Ph}_4\text{B}^-$  at pH 10 (organic ions as co-ions). Changes in frequency,  $\Delta f_n/n$  (negative values) and changes in energy dissipation,  $\Delta D_n$  (positive values) are represented. Each overtone from 3 to 13 is shown in a different tonality, from dark to pale color.
